# Supplementary material for: Downstream processing of microalgal feedstock for lipid and carbohydrate in a biorefinery concept: a holistic approach for biofuel applications
Source: Royal Society of Chemistry journal article supplement (doi:10.1039/c6ra01477a), 2016-01-01
Supplement: c6ra01477a1.pdf [file c6ra01477a1.pdf]

1

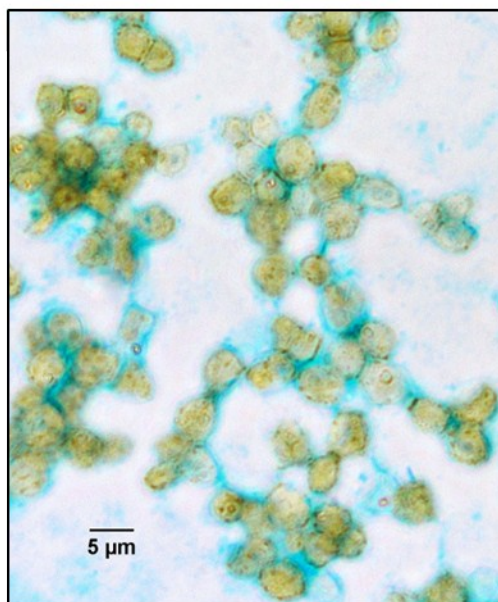

2

3 Fig. S1. Microscopic image of microalgal cells stained with Alcian blue, viewed under phase  
4 contrast illumination (40x). Stain has been taken up by the polysaccharide material around the  
5 cells.

6

7

8

9

10

11

12

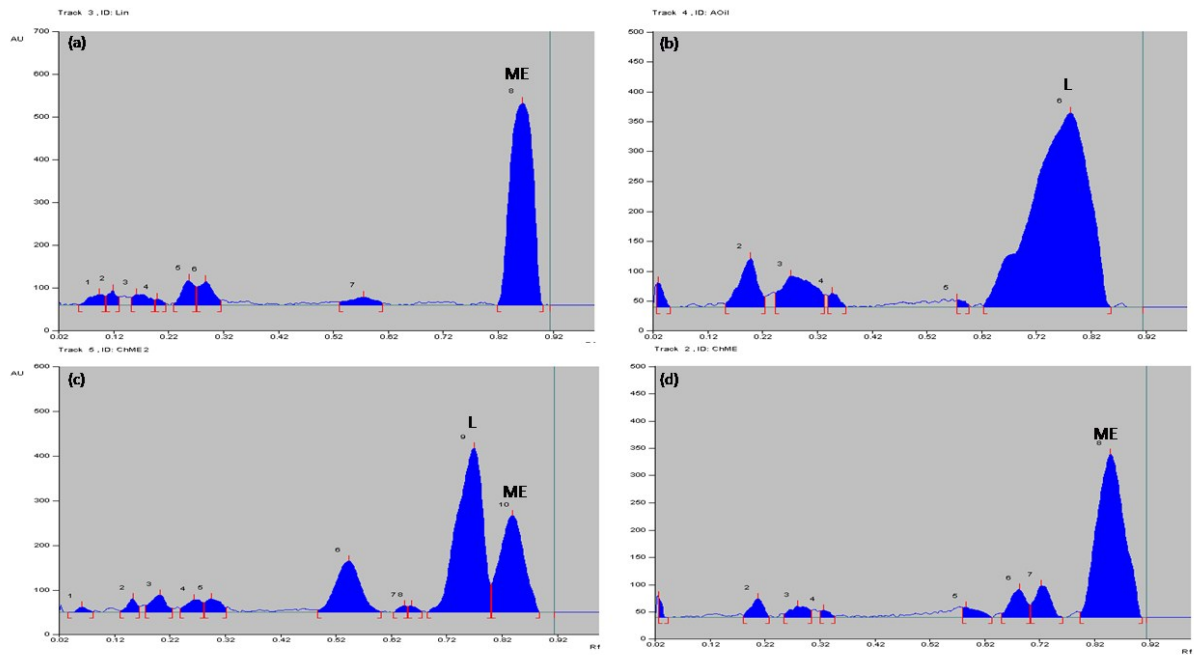

13

14 Fig. S2. Two-dimensional HPTLC chromatogram of lipid and FAME (a) standard methyl  
 15 linoleate (ME) (Rf 0.82 – 0.92) (b) algal lipid (L) (Rf 0.72 – 0.82) (c) partially converted algal  
 16 lipid with some L and ME (d) algal FAME (biodiesel).

17
